# Supplementary material for: Perceptions and Practices towards Anthrax in Selected Agricultural Communities in Arua District, Uganda
Source: PubMed Central journal article supplement (PMC7519178; doi:10.1155/2020/9083615), 2020-09-16
Supplement: 9083615.f1.pdf [file 9083615.f1.pdf]

| <b>Category</b>                                               | <b>Code</b>                                | <b>Case</b>        |
|---------------------------------------------------------------|--------------------------------------------|--------------------|
| Demographic characteristics                                   | Age range of respondents                   | Janduwa data       |
| Demographic characteristics                                   | Sex of respondents                         | Janduwa data       |
| Demographic characteristics                                   | Economic activities                        | Janduwa data       |
| Awareness of anthrax                                          | Common diseases of humans                  | Janduwa data       |
| Awareness of anthrax                                          | Common diseases of livestock               | Janduwa data       |
| Awareness of anthrax                                          | Heard of anthrax                           | Janduwa data       |
| Cultural norms, beliefs and practices associated with anthrax | Occupational risks                         | Janduwa data       |
| Cultural norms, beliefs and practices associated with anthrax | Cultural norms and beliefs                 | Janduwa data       |
| Demographic characteristics                                   | Age range of respondents                   | Ndara data         |
| Demographic characteristics                                   | Sex of respondents                         | Ndara data         |
| Demographic characteristics                                   | Economic activities                        | Ndara data         |
| Demographic characteristics                                   | Economic activities                        | Ndara data         |
| Awareness of anthrax                                          | Common diseases of humans                  | Ndara data         |
| Awareness of anthrax                                          | Common diseases of livestock               | Ndara data         |
| Awareness of anthrax                                          | Heard of anthrax                           | Ndara data         |
| Awareness of anthrax                                          | Heard of anthrax                           | Ndara data         |
| Awareness of anthrax                                          | Transmission and clinical signs of anthrax | Ndara data         |
| Awareness of anthrax                                          | Transmission and clinical signs of anthrax | Ndara data         |
| Cultural norms, beliefs and practices associated with anthrax | Cultural norms and beliefs                 | Ndara data         |
| Cultural norms, beliefs and practices associated with anthrax | Cultural norms and beliefs                 | Ndara data         |
| Demographic characteristics                                   | Age range of respondents                   | Ocea data          |
| Demographic characteristics                                   | Sex of respondents                         | Ocea data          |
| Demographic characteristics                                   | Economic activities                        | Ocea data          |
| Demographic characteristics                                   | Economic activities                        | Ocea data          |
| Awareness of anthrax                                          | Heard of anthrax                           | Ocea data          |
| Awareness of anthrax                                          | Transmission and clinical signs of anthrax | Ocea data          |
| Awareness of anthrax                                          | Transmission and clinical signs of anthrax | Ocea data          |
| Cultural norms, beliefs and practices associated with anthrax | Cultural norms and beliefs                 | Ocea data          |
| Cultural norms, beliefs and practices associated with anthrax | Cultural norms and beliefs                 | Ocea data          |
| Cultural norms, beliefs and practices associated with anthrax | Cultural norms and beliefs                 | Ocea data          |
| Cultural norms, beliefs and practices associated with anthrax | Cultural norms and beliefs                 | Ocea data          |
| Demographic characteristics                                   | Age range of respondents                   | Ombeniva data.docx |
| Demographic characteristics                                   | Sex of respondents                         | Ombeniva data.docx |
| Demographic characteristics                                   | Economic activities                        | Ombeniva data.docx |
| Awareness of anthrax                                          | Common diseases of humans                  | Ombeniva data.docx |
| Awareness of anthrax                                          | Common diseases of livestock               | Ombeniva data.docx |
| Awareness of anthrax                                          | Heard of anthrax                           | Ombeniva data.docx |
| Awareness of anthrax                                          | Transmission and clinical signs of anthrax | Ombeniva data.docx |
| Cultural norms, beliefs and practices associated with anthrax | Cultural norms and beliefs                 | Ombeniva data.docx |
| Demographic characteristics                                   | Age range of respondents                   | Parabok data.docx  |
| Demographic characteristics                                   | Sex of respondents                         | Parabok data.docx  |

**Category**

Demographic characteristics  
Awareness of anthrax  
Cultural norms, beliefs and practices associated with anthrax  
Cultural norms, beliefs and practices associated with anthrax  
Cultural norms, beliefs and practices associated with anthrax  
Demographic characteristics  
Demographic characteristics  
Demographic characteristics  
Demographic characteristics  
Awareness of anthrax  
Cultural norms, beliefs and practices associated with anthrax  
Cultural norms, beliefs and practices associated with anthrax

**Code**

Economic activities  
Common diseases of humans  
Common diseases of livestock  
Common diseases of livestock  
Heard of anthrax  
Transmission and clinical signs of anthrax  
Cultural norms and beliefs  
Proximity to wildlife reserve  
Cultural norms and beliefs  
Age range of respondents  
Sex of respondents  
Economic activities  
Presence of active cases  
Common diseases of humans  
Common diseases of livestock  
Transmission and clinical signs of anthrax  
Heard of anthrax  
Control of anthrax  
Occupational risks  
Cultural norms and beliefs

**Case**

Parabok data.docx  
Pulwal data  
Pulwal data

| Text                                                              | Words | % Words |
|-------------------------------------------------------------------|-------|---------|
| Participants of the FGDs were within the age bracket 18-60 year   | 19    | 0.70%   |
| more females (55%)                                                | 3     | 0.10%   |
| subsistence farming, although other activities such as fishin     | 10    | 0.40%   |
| we experience symptoms similar to those shown in the pict         | 15    | 0.60%   |
| Livestock suffer a lot with diseases of ticks, tsetse flies ar    | 44    | 1.60%   |
| a strange disease which is spreading in our community aft         | 13    | 0.50%   |
| poor disposal of dead animals, occupational risks, consumption    | 10    | 0.40%   |
| Disposal of dead livestock is a taboo which would result into the | 21    | 0.80%   |
| he age bracket 18-65 years                                        | 6     | 0.20%   |
| 50% male and 50% female.                                          | 5     | 0.20%   |
| subsistence farming                                               | 2     | 0.10%   |
| charcoal burning, casual labor, papyrus cutting, brewing loca     | 9     | 0.40%   |
| fever, malaria, cough, diarrhea,                                  | 4     | 0.20%   |
| diseases of ticks, tsetse flies and worms.                        | 7     | 0.30%   |
| a strange disease which is spreading in our community aft         | 13    | 0.50%   |
| We heard that people are sick in Pulwal with a sickness of anim:  | 13    | 0.50%   |
| a sickness of animals                                             | 4     | 0.20%   |
| Since this condition seems to come from animals, herdsman and     | 21    | 0.80%   |
| livestock in our communities are kept, grazed and watered         | 10    | 0.40%   |
| a very big taboo to bury dead livestock because you will have     | 20    | 0.80%   |
| within the age bracket 18-66 years                                | 7     | 0.40%   |
| with more females (55%)                                           | 4     | 0.20%   |
| subsistence farming                                               | 2     | 0.10%   |
| casual labor, papyrus cutting, brewing local beer                 | 7     | 0.40%   |
| Who would have informed us of this "anthrax" if it was not for yo | 39    | 2.00%   |
| animals are dying suddenly in our village                         | 7     | 0.40%   |
| One month ago, our neighbor lost 12 goats within three days and   | 40    | 2.00%   |
| One month ago, our neighbor lost 12 goats within three days and   | 21    | 1.10%   |
| a taboo which would result into the remaining herd being wip      | 16    | 0.80%   |
| ommunities are kept, grazed and watered communally                | 7     | 0.40%   |
| ur culture it is a very big taboo to bury dead livestock becaus   | 18    | 0.90%   |
| Participants of the FGDs were within the age bracket 18-70 year   | 12    | 0.50%   |
| femala and males equivalent proportion                            | 5     | 0.20%   |
| crop farming, livestock keeping, fishing, charcoal burning, c     | 9     | 0.30%   |
| fever, malaria, cough,                                            | 3     | 0.10%   |
| ticks, tsetse flies                                               | 3     | 0.10%   |
| We were sensitized last month by the health workers durin         | 31    | 1.20%   |
| spreading in our community after eating dead meat                 | 8     | 0.30%   |
| It is a bad omen to bury dead livestock. You leave people to e    | 15    | 0.60%   |
| within the age bracket 18-70 years                                | 7     | 0.30%   |
| mostly males (65%)                                                | 3     | 0.10%   |

| Text                                                               | Words | % Words |
|--------------------------------------------------------------------|-------|---------|
| grow crops and keep cattle, pigs, sheep and goats, fishing, c      | 14    | 0.60%   |
| ur biggest challenge has always been fever, malaria, cough, dia    | 61    | 2.70%   |
| diseases of ticks, blindness, tsetse flies, lumpy skin disease :   | 11    | 0.50%   |
| diseases of ticks, blindness, tsetse flies, lumpy skin disease :   | 11    | 0.50%   |
| Heard of sudden death of cattle in neighboring Pulwal              | 9     | 0.40%   |
| sudden death of cattle                                             | 4     | 0.20%   |
| Burning or burying of dead livestock is not allowed in our culture | 12    | 0.50%   |
| Many of us in the community enter Ajia game reserve to graze li    | 29    | 1.30%   |
| the livestock in our communities are kept, grazed and wal          | 11    | 0.50%   |
| e FGDs were within the age bracket 18-70 years                     | 10    | 0.50%   |
| mostly females (55%).                                              | 3     | 0.20%   |
| subsistence farming (>90%), although other activities such :       | 18    | 0.90%   |
| Two suspected cutaneous anthrax cases, male by gender were         | 65    | 3.30%   |
| malaria, cough, diarrhea, and typhoid                              | 5     | 0.30%   |
| diseases of ticks, tsetse flies                                    | 5     | 0.30%   |
| Sudden death occurred of 5 cattle in our village herd and we dec   | 58    | 3.00%   |
| Two of the six of us suffered skin lesions. Several attempts to    | 39    | 2.00%   |
| When skin lesions appeared and persisted, I visited nearby clinic  | 46    | 2.40%   |
| Since this condition seems to come from animals, herdsman and      | 78    | 4.00%   |
| It is possibly true that we could have stopped anthrax from spre   | 43    | 2.20%   |
